# Supplementary material for: Deep Succinylproteomics of Brain Tissues of Intracerebral Hemorrhage with Inhibition of Toll-like Receptor 4 Signaling
Source: Research Square preprint supplement (doi:10.21203/rs.3.rs-392813/v1), 2021-04-30
Supplement: Supplementary file 1 [file 9ddaa23898f38de1e4b1f33f.docx]

**Supplementary Table 1. Differentially expressed (DE) proteins in the whole succinylproteome dataset of mouse ICH brain tissues treated with TAK242 or Vehicle.**

| Protein accession | Position | Amino acid | Gene name | Sham | TAK242_ICH | Vehicle_ICH |
| --- | --- | --- | --- | --- | --- | --- |
| A2AQP0 | 919 | K | Myh7b | 0.658052 | 1.105376 | 1.360174 |
| O08539 | 13 | K | Bin1 | 1.354904 | 0.780574 | 0.897237 |
| O55042 | 80 | K | Snca | 0.716318 | 1.370513 | 1.115261 |
| O55126 | 276 | K | Nipsnap2 | 2.003641 | 0.34754 | 0.678942 |
| O55131 | 237 | K | Septin7 | 0.750892 | 1.046997 | 1.281636 |
| P00920 | 167 | K | Ca2 | 0.784476 | 1.246248 | 1.037809 |
| P00920 | 132 | K | Ca2 | 0.611312 | 1.379024 | 1.205244 |
| P01837 | 100 | K | Igkc | 0.247969 | 1.249001 | 1.439956 |
| P03921 | 540 | K | Mtnd5 | 0.837361 | 0.933279 | 1.324314 |
| P03995 | 83 | K | Gfap | 0.662988 | 1.083795 | 1.344979 |
| P03995 | 402 | K | Gfap | 0.653539 | 1.147929 | 1.377123 |
| P05202 | 363 | K | Got2 | 1.79648 | 1.125304 | 0.00304 |
| P68369 | 401 | K | Tuba1a | 1.273897 | 0.950947 | 0.806984 |
| P06745 | 116 | K | Gpi | 1.257735 | 0.750498 | 1.014044 |
| Q00898 | 181 | K | Serpina1e | 0.411006 | 1.110123 | 1.554505 |
| P08249 | 91 | K | Mdh2 | 0.617209 | 0.86075 | 1.615288 |
| P08551 | 157 | K | Nefl | 1.267218 | 0.67318 | 1.128215 |
| P08553 | 842 | K | Nefm | 1.188465 | 1.166534 | 0.675871 |
| P09671 | 89 | K | Sod2 | 0.783062 | 1.053396 | 1.227701 |
| P10649 | 136 | K | Gstm1 | 0.773828 | 0.97688 | 1.203524 |
| P12960 | 757 | K | Cntn1 | 0.78273 | 0.839123 | 1.419416 |
| P15532 | 12 | K | Nme1 | 0.774863 | 1.313915 | 1.000592 |
| P16546 | 1419 | K | Sptan1 | 0.73685 | 0.978445 | 1.372965 |
| P16546 | 30 | K | Sptan1 | 0.782485 | 1.083096 | 1.210689 |
| P18760 | 30 | K | Cfl1 | 1.205365 | 0.98578 | 0.761119 |
| P19246 | 606 | K | Nefh | 0.759932 | 1.199443 | 1.186384 |
| P35486 | 83 | K | Pdha1 | 1.305971 | 0.839743 | 0.877277 |
| P35486 | 39 | K | Pdha1 | 1.313698 | 0.904744 | 0.817253 |
| P42125 | 206 | K | Eci1 | 0.766821 | 1.142021 | 1.221957 |
| P43006 | 40 | K | Slc1a2 | 1.281182 | 0.908062 | 0.83588 |
| P45952 | 217 | K | Acadm | 0.740763 | 1.191459 | 1.171435 |
| P46660 | 369 | K | Ina | 1.30451 | 0.84065 | 0.985519 |
| P47791 | 448 | K | Gsr | 1.306241 | 0.615446 | 0.967763 |
| P48962 | 23 | K | Slc25a4 | 1.453266 | 0.855649 | 0.735978 |
| P50544 | 196 | K | Acadvl | 0.558626 | 1.174756 | 1.38738 |
| P51881 | 23 | K | Slc25a5 | 1.453391 | 0.855557 | 0.735936 |
| P54869 | 310 | K | Hmgcs2 | 0.644802 | 1.218756 | 1.266018 |
| P56564 | 521 | K | Slc1a3 | 0.721143 | 1.149019 | 1.221141 |
| P58281 | 328 | K | Opa1 | 0.638958 | 0.917724 | 1.523682 |
| P60710 | 191 | K | Actb | 0.801095 | 1.20614 | 1.045018 |
| P61264 | 82 | K | Stx1b | 0.765787 | 1.221265 | 1.096467 |
| P61922 | 231 | K | Abat | 1.486714 | 0.858785 | 0.680735 |
| P62761 | 74 | K | Vsnl1 | 0.765197 | 0.976709 | 1.363983 |
| P63001 | 166 | K | Rac1 | 0.852517 | 0.93864 | 1.294278 |
| P63017 | 328 | K | Hspa8 | 0.687012 | 1.037169 | 1.360245 |
| P63017 | 246 | K | Hspa8 | 0.926996 | 0.771531 | 1.524469 |
| P63038 | 405 | K | Hspd1 | 0.67045 | 1.390737 | 1.251059 |
| P63040 | 14 | K | Cplx1 | 1.224037 | 1.055701 | 0.736964 |
| P68372 | 58 | K | Tubb4b | 1.22923 | 1.00188 | 0.807557 |
| P68372 | 324 | K | Tubb4b | 0.648199 | 1.252178 | 1.233919 |
| P70404 | 221 | K | Idh3g | 1.498282 | 0.691128 | 0.772114 |
| P97300 | 147 | K | Nptn | 0.766581 | 1.308548 | 1.006998 |
| P97807 | 293 | K | Fh | 1.672787 | 0.569662 | 0.631126 |
| P97823 | 224 | K | Lypla1 | 1.740743 | 0.504442 | 0.593766 |
| Q03265 | 218 | K | Atp5f1a | 0.792678 | 0.958886 | 1.318252 |
| Q3TC72 | 174 | K | Fahd2 | 0.670691 | 1.263388 | 1.21231 |
| Q3U186 | 557 | K | Rars2 | 0.696368 | 0.930443 | 1.478469 |
| Q3URS9 | 159 | K | Ccdc51 | 1.200081 | 1.111963 | 0.723553 |
| Q60771 | 43 | K | Cldn11 | 1.325358 | 0.853785 | 0.832775 |
| Q60930 | 32 | K | Vdac2 | 0.90519 | 1.594851 | 0.598675 |
| Q60931 | 96 | K | Vdac3 | 0.716654 | 1.186302 | NA |
| Q60931 | 274 | K | Vdac3 | 0.72023 | 1.043014 | 1.324927 |
| Q61361 | 590 | K | Bcan | 1.154363 | 1.188132 | 0.729439 |
| Q62425 | 56 | K | Ndufa4 | 1.327888 | 0.813046 | 0.685327 |
| Q64433 | 66 | K | Hspe1 | 1.38716 | 0.84885 | 0.793507 |
| Q68FD5 | 1118 | K | Cltc | 1.158412 | 0.743322 | 1.146664 |
| Q6DFV6 | 1242 | K | Fndc3c1 | 1.522451 | 0.182136 | 1.334147 |
| Q6IRU5 | 204 | K | Cltb | 1.262536 | 0.963382 | 0.805607 |
| Q6PIC6 | 349 | K | Atp1a3 | 1.181223 | 0.785732 | 1.141842 |
| Q6PIC6 | 602 | K | Atp1a3 | 1.229428 | 1.0844 | 0.706659 |
| Q6PIC6 | 688 | K | Atp1a3 | 0.839358 | 1.406235 | 0.830138 |
| Q6PIE5 | 668 | K | Atp1a2 | 1.381173 | 0.877962 | 0.996865 |
| Q6PIE5 | 658 | K | Atp1a2 | 1.372183 | 0.968304 | 0.771603 |
| Q7TMF3 | 8 | K | Ndufa12 | 0.688894 | 1.429095 | 1.146566 |
| Q7TMM9 | 58 | K | Tubb2a | 1.367653 | 0.890668 | 0.773997 |
| Q7TSJ2 | 156 | K | Map6 | 1.170917 | 0.672514 | 1.339899 |
| Q810U3 | 86 | K | Nfasc | 0.795258 | 1.210911 | 1.088792 |
| Q8BIJ6 | 812 | K | Iars2 | 1.331012 | 0.81695 | 0.879389 |
| Q8BKZ9 | 321 | K | Pdhx | 1.266366 | 0.796557 | 1.05344 |
| Q8BLK3 | 194 | K | Lsamp | 1.21027 | 0.596943 | 1.156247 |
| Q8BMF4 | 461 | K | Dlat | 1.212363 | 1.010952 | 0.796762 |
| Q8BMS1 | 644 | K | Hadha | 0.677082 | 1.092734 | 1.336029 |
| Q8BMS1 | 406 | K | Hadha | 0.717105 | 1.259525 | 1.123213 |
| Q8BMS4 | 144 | K | Coq3 | 0.825069 | 1.625882 | 0.845997 |
| Q8BYM5 | 597 | K | Nlgn3 | 0.774363 | 1.256474 | 1.062022 |
| Q8CFI5 | 170 | K | Pars2 | 1.280249 | 1.001236 | 0.728374 |
| Q8CFI5 | 171 | K | Pars2 | 1.165829 | 0.592073 | 1.337841 |
| Q8K0T0 | 646 | K | Rtn1 | 0.808788 | 1.052804 | 1.222454 |
| Q8K1R3 | 583 | K | Pnpt1 | 0.841271 | 1.26709 | 0.969247 |
| Q8K411 | 848 | K | Pitrm1 | 1.396866 | 0.774077 | 0.821635 |
| Q8K4Z3 | 240 | K | Naxe | 1.23861 | 0.996284 | 0.789838 |
| Q8VDN2 | 45 | K | Atp1a1 | 0.693805 | 1.111016 | 1.34842 |
| Q8VI40 | 253 | K | Trim60 | 1.300184 | 0.881646 | 0.859499 |
| Q91VD9 | 470 | K | Ndufs1 | 1.295148 | 0.786658 | 0.982068 |
| Q91VM9 | 242 | K | Ppa2 | 1.318653 | 0.846639 | 0.851663 |
| Q91VR2 | 115 | K | Atp5f1c | 1.110314 | 1.239554 | 0.660213 |
| Q91WK1 | 95 | K | Spryd4 | 0.658436 | 1.140173 | 1.287264 |
| Q91XV3 | 18 | K | Basp1 | 0.82323 | 0.996406 | 1.399443 |
| Q91ZZ3 | 23 | K | Sncb | 1.213794 | 1.037029 | 0.799754 |
| Q921I1 | 467 | K | Tf | 0.510739 | 1.158636 | 1.31176 |
| Q921I1 | 26 | K | Tf | 0.566511 | 1.196647 | 1.220807 |
| Q922B1 | 146 | K | Macrod1 | 1.358668 | 0.795611 | 0.850369 |
| Q923Z3 | 134 | K | Mto1 | 1.248123 | 1.042744 | 0.697237 |
| Q99KI0 | 309 | K | Aco2 | 1.392949 | 0.748938 | 0.878541 |
| Q99KI0 | 549 | K | Aco2 | 0.785664 | 1.321262 | 0.9574 |
| Q99KI0 | 138 | K | Aco2 | 0.694718 | 1.262709 | 1.139841 |
| Q99L04 | 6 | K | Dhrs1 | 1.267713 | 0.972985 | 0.796246 |
| Q99LC3 | 84 | K | Ndufa10 | 0.831812 | 0.932802 | 1.305309 |
| Q99M04 | 317 | K | Lias | 0.743667 | 1.244261 | 1.095428 |
| Q99N28 | 215 | K | Cadm3 | 1.271924 | 0.696885 | NA |
| Q9CPY7 | 45 | K | Lap3 | 0.795632 | 1.233998 | 1.06722 |
| Q9CQQ7 | 154 | K | Atp5pb | 0.849613 | 1.319309 | 0.903017 |
| Q9CQR4 | 43 | K | Acot13 | 1.175572 | 1.098804 | 0.742096 |
| Q9CWZ7 | 159 | K | Napg | 1.278858 | 0.963477 | 0.758234 |
| Q9CXD6 | 253 | K | Mcur1 | 0.840741 | 0.93848 | 1.289309 |
| Q9CZ13 | 248 | K | Uqcrc1 | 1.173221 | 1.092306 | 0.780015 |
| Q9CZN7 | 469 | K | Shmt2 | 0.708836 | 1.114307 | 1.265002 |
| Q9CZU6 | 103 | K | Cs | 1.341588 | 0.971568 | 0.699407 |
| Q9D0K2 | 446 | K | Oxct1 | 0.754389 | 1.60657 | 0.719168 |
| Q9D2P8 | 104 | K | Mobp | 0.725134 | 0.989811 | 1.381613 |
| Q9D404 | 113 | K | Oxsm | 0.826206 | 1.014256 | 1.244131 |
| Q9D6J6 | 208 | K | Ndufv2 | 0.636143 | 1.398587 | 0.936053 |
| Q9D855 | 45 | K | Uqcrb | 0.656292 | 1.077967 | 1.363866 |
| Q9D8N0 | 277 | K | Eef1g | 0.719893 | 1.505985 | 0.978181 |
| Q9D8S4 | 160 | K | Rexo2 | 0.822701 | 0.881317 | 1.325706 |
| Q9DB20 | 100 | K | Atp5po | 0.792361 | 1.27881 | 1.014663 |
| Q9DB20 | 60 | K | Atp5po | 0.715834 | 0.821276 | 1.544576 |
| Q9DB20 | 192 | K | Atp5po | 1.310768 | 0.725588 | 0.988133 |
| Q9DCS3 | 317 | K | Mecr | 1.272736 | 0.928623 | 0.804982 |
| Q9EQ20 | 55 | K | Aldh6a1 | 1.227982 | 1.08361 | 0.715176 |
| Q9JHI5 | 76 | K | Ivd | 1.300666 | 0.874634 | 0.860252 |
| Q9JHU4 | 1805 | K | Dync1h1 | 0.699239 | 1.287958 | 1.163822 |
| Q9QUP5 | 105 | K | Hapln1 | 1.164802 | 1.159868 | 0.732894 |
| Q9R0P9 | 135 | K | Uchl1 | 1.268195 | 1.083165 | 0.652665 |
| Q9R111 | 189 | K | Gda | 1.071071 | 0.678104 | 1.228576 |
| Q9WTP7 | 20 | K | Ak3 | 0.637082 | 1.125741 | 1.358481 |
| Q9Z1J3 | 159 | K | Nfs1 | 1.183239 | 0.771223 | 1.093818 |
| Q9Z2I9 | 120 | K | Sucla2 | 1.234847 | 1.040082 | 0.77182 |
| Q9Z2I9 | 438 | K | Sucla2 | 1.189221 | 1.093328 | 0.756406 |

**Supplementary Table 2. Cluster information of differentially expressed (DE) proteins in the whole succinylproteome dataset of mouse ICH brain tissues treated with TAK242 or Vehicle.**

| Protein accession | Position | Amino acid | Gene name | Sham | TAK242_ICH | Vehicle_ICH | Cluster | Membership |
| --- | --- | --- | --- | --- | --- | --- | --- | --- |
| P61922 | 231 | K | Abat | 1.486714 | 0.858785 | 0.680735 | Cluster1 | 0.782864 |
| Q9CQR4 | 43 | K | Acot13 | 1.175572 | 1.098804 | 0.742096 | Cluster1 | 0.902342 |
| Q9EQ20 | 55 | K | Aldh6a1 | 1.227982 | 1.08361 | 0.715176 | Cluster1 | 0.946396 |
| Q6PIE5 | 658 | K | Atp1a2 | 1.372183 | 0.968304 | 0.771603 | Cluster1 | 0.903488 |
| Q6PIC6 | 602 | K | Atp1a3 | 1.229428 | 1.0844 | 0.706659 | Cluster1 | 0.944157 |
| Q91VR2 | 115 | K | Atp5f1c | 1.110314 | 1.239554 | 0.660213 | Cluster1 | 0.703819 |
| Q61361 | 590 | K | Bcan | 1.154363 | 1.188132 | 0.729439 | Cluster1 | 0.782198 |
| Q3URS9 | 159 | K | Ccdc51 | 1.200081 | 1.111963 | 0.723553 | Cluster1 | 0.90452 |
| P18760 | 30 | K | Cfl1 | 1.205365 | 0.98578 | 0.761119 | Cluster1 | 0.994592 |
| Q6IRU5 | 204 | K | Cltb | 1.262536 | 0.963382 | 0.805607 | Cluster1 | 0.907097 |
| P63040 | 14 | K | Cplx1 | 1.224037 | 1.055701 | 0.736964 | Cluster1 | 0.971987 |
| Q9CZU6 | 103 | K | Cs | 1.341588 | 0.971568 | 0.699407 | Cluster1 | 0.980066 |
| Q99L04 | 6 | K | Dhrs1 | 1.267713 | 0.972985 | 0.796246 | Cluster1 | 0.936401 |
| Q8BMF4 | 461 | K | Dlat | 1.212363 | 1.010952 | 0.796762 | Cluster1 | 0.995069 |
| P05202 | 363 | K | Got2 | 1.79648 | 1.125304 | 0.00304 | Cluster1 | 0.860373 |
| Q9QUP5 | 105 | K | Hapln1 | 1.164802 | 1.159868 | 0.732894 | Cluster1 | 0.82315 |
| Q64433 | 66 | K | Hspe1 | 1.38716 | 0.84885 | 0.793507 | Cluster1 | 0.495185 |
| Q9DCS3 | 317 | K | Mecr | 1.272736 | 0.928623 | 0.804982 | Cluster1 | 0.803555 |
| Q923Z3 | 134 | K | Mto1 | 1.248123 | 1.042744 | 0.697237 | Cluster1 | 0.977963 |
| Q9CWZ7 | 159 | K | Napg | 1.278858 | 0.963477 | 0.758234 | Cluster1 | 0.956045 |
| Q8K4Z3 | 240 | K | Naxe | 1.23861 | 0.996284 | 0.789838 | Cluster1 | 0.984271 |
| Q62425 | 56 | K | Ndufa4 | 1.327888 | 0.813046 | 0.685327 | Cluster1 | 0.723313 |
| P08553 | 842 | K | Nefm | 1.188465 | 1.166534 | 0.675871 | Cluster1 | 0.836959 |
| Q8CFI5 | 170 | K | Pars2 | 1.280249 | 1.001236 | 0.728374 | Cluster1 | 0.994765 |
| P35486 | 39 | K | Pdha1 | 1.313698 | 0.904744 | 0.817253 | Cluster1 | 0.651541 |
| P43006 | 40 | K | Slc1a2 | 1.281182 | 0.908062 | 0.83588 | Cluster1 | 0.617546 |
| P48962 | 23 | K | Slc25a4 | 1.453266 | 0.855649 | 0.735978 | Cluster1 | 0.663436 |
| P51881 | 23 | K | Slc25a5 | 1.453391 | 0.855557 | 0.735936 | Cluster1 | 0.663235 |
| Q91ZZ3 | 23 | K | Sncb | 1.213794 | 1.037029 | 0.799754 | Cluster1 | 0.99393 |
| Q9Z2I9 | 120 | K | Sucla2 | 1.234847 | 1.040082 | 0.77182 | Cluster1 | 0.99217 |
| Q9Z2I9 | 438 | K | Sucla2 | 1.189221 | 1.093328 | 0.756406 | Cluster1 | 0.923506 |
| P68369 | 401 | K | Tuba1a | 1.273897 | 0.950947 | 0.806984 | Cluster1 | 0.865368 |
| Q7TMM9 | 58 | K | Tubb2a | 1.367653 | 0.890668 | 0.773997 | Cluster1 | 0.704599 |
| P68372 | 58 | K | Tubb4b | 1.22923 | 1.00188 | 0.807557 | Cluster1 | 0.983282 |
| Q9R0P9 | 135 | K | Uchl1 | 1.268195 | 1.083165 | 0.652665 | Cluster1 | 0.949239 |
| Q9CZ13 | 248 | K | Uqcrc1 | 1.173221 | 1.092306 | 0.780015 | Cluster1 | 0.917796 |
| Q60930 | 32 | K | Vdac2 | 0.90519 | 1.594851 | 0.598675 | Cluster1 | 0.39474 |
| Q99KI0 | 309 | K | Aco2 | 1.392949 | 0.748938 | 0.878541 | Cluster2 | 0.925383 |
| Q6PIE5 | 668 | K | Atp1a2 | 1.381173 | 0.877962 | 0.996865 | Cluster2 | 0.941825 |
| Q6PIC6 | 349 | K | Atp1a3 | 1.181223 | 0.785732 | 1.141842 | Cluster2 | 0.752749 |
| Q9DB20 | 192 | K | Atp5po | 1.310768 | 0.725588 | 0.988133 | Cluster2 | 0.976433 |
| O08539 | 13 | K | Bin1 | 1.354904 | 0.780574 | 0.897237 | Cluster2 | 0.921811 |
| Q60771 | 43 | K | Cldn11 | 1.325358 | 0.853785 | 0.832775 | Cluster2 | 0.543499 |
| Q68FD5 | 1118 | K | Cltc | 1.158412 | 0.743322 | 1.146664 | Cluster2 | 0.715552 |
| P97807 | 293 | K | Fh | 1.672787 | 0.569662 | 0.631126 | Cluster2 | 0.752181 |
| Q6DFV6 | 1242 | K | Fndc3c1 | 1.522451 | 0.182136 | 1.334147 | Cluster2 | 0.739608 |
| Q9R111 | 189 | K | Gda | 1.071071 | 0.678104 | 1.228576 | Cluster2 | 0.549603 |
| P06745 | 116 | K | Gpi | 1.257735 | 0.750498 | 1.014044 | Cluster2 | 0.953743 |
| P47791 | 448 | K | Gsr | 1.306241 | 0.615446 | 0.967763 | Cluster2 | 0.945187 |
| Q8BIJ6 | 812 | K | Iars2 | 1.331012 | 0.81695 | 0.879389 | Cluster2 | 0.821478 |
| P70404 | 221 | K | Idh3g | 1.498282 | 0.691128 | 0.772114 | Cluster2 | 0.812426 |
| P46660 | 369 | K | Ina | 1.30451 | 0.84065 | 0.985519 | Cluster2 | 0.98054 |
| Q9JHI5 | 76 | K | Ivd | 1.300666 | 0.874634 | 0.860252 | Cluster2 | 0.563948 |
| Q8BLK3 | 194 | K | Lsamp | 1.21027 | 0.596943 | 1.156247 | Cluster2 | 0.741119 |
| P97823 | 224 | K | Lypla1 | 1.740743 | 0.504442 | 0.593766 | Cluster2 | 0.798444 |
| Q922B1 | 146 | K | Macrod1 | 1.358668 | 0.795611 | 0.850369 | Cluster2 | 0.789511 |
| Q7TSJ2 | 156 | K | Map6 | 1.170917 | 0.672514 | 1.339899 | Cluster2 | 0.574474 |
| Q91VD9 | 470 | K | Ndufs1 | 1.295148 | 0.786658 | 0.982068 | Cluster2 | 0.990253 |
| P08551 | 157 | K | Nefl | 1.267218 | 0.67318 | 1.128215 | Cluster2 | 0.817321 |
| Q9Z1J3 | 159 | K | Nfs1 | 1.183239 | 0.771223 | 1.093818 | Cluster2 | 0.817263 |
| O55126 | 276 | K | Nipsnap2 | 2.003641 | 0.34754 | 0.678942 | Cluster2 | 0.985587 |
| Q8CFI5 | 171 | K | Pars2 | 1.165829 | 0.592073 | 1.337841 | Cluster2 | 0.593024 |
| P35486 | 83 | K | Pdha1 | 1.305971 | 0.839743 | 0.877277 | Cluster2 | 0.757264 |
| Q8BKZ9 | 321 | K | Pdhx | 1.266366 | 0.796557 | 1.05344 | Cluster2 | 0.944491 |
| Q8K411 | 848 | K | Pitrm1 | 1.396866 | 0.774077 | 0.821635 | Cluster2 | 0.759842 |
| Q91VM9 | 242 | K | Ppa2 | 1.318653 | 0.846639 | 0.851663 | Cluster2 | 0.640734 |
| Q8VI40 | 253 | K | Trim60 | 1.300184 | 0.881646 | 0.859499 | Cluster2 | 0.531462 |
| P45952 | 217 | K | Acadm | 0.740763 | 1.191459 | 1.171435 | Cluster3 | 0.695562 |
| Q99KI0 | 549 | K | Aco2 | 0.785664 | 1.321262 | 0.9574 | Cluster3 | 0.868436 |
| Q99KI0 | 138 | K | Aco2 | 0.694718 | 1.262709 | 1.139841 | Cluster3 | 0.900843 |
| P60710 | 191 | K | Actb | 0.801095 | 1.20614 | 1.045018 | Cluster3 | 0.995067 |
| Q6PIC6 | 688 | K | Atp1a3 | 0.839358 | 1.406235 | 0.830138 | Cluster3 | 0.595621 |
| Q9CQQ7 | 154 | K | Atp5pb | 0.849613 | 1.319309 | 0.903017 | Cluster3 | 0.695562 |
| Q9DB20 | 100 | K | Atp5po | 0.792361 | 1.27881 | 1.014663 | Cluster3 | 0.954913 |
| P00920 | 167 | K | Ca2 | 0.784476 | 1.246248 | 1.037809 | Cluster3 | 0.989106 |
| P00920 | 132 | K | Ca2 | 0.611312 | 1.379024 | 1.205244 | Cluster3 | 0.894227 |
| Q8BMS4 | 144 | K | Coq3 | 0.825069 | 1.625882 | 0.845997 | Cluster3 | 0.630118 |
| Q9JHU4 | 1805 | K | Dync1h1 | 0.699239 | 1.287958 | 1.163822 | Cluster3 | 0.89464 |
| Q9D8N0 | 277 | K | Eef1g | 0.719893 | 1.505985 | 0.978181 | Cluster3 | 0.892875 |
| Q3TC72 | 174 | K | Fahd2 | 0.670691 | 1.263388 | 1.21231 | Cluster3 | 0.747379 |
| Q8BMS1 | 406 | K | Hadha | 0.717105 | 1.259525 | 1.123213 | Cluster3 | 0.933503 |
| P54869 | 310 | K | Hmgcs2 | 0.644802 | 1.218756 | 1.266018 | Cluster3 | 0.519362 |
| P63038 | 405 | K | Hspd1 | 0.67045 | 1.390737 | 1.251059 | Cluster3 | 0.868914 |
| Q9CPY7 | 45 | K | Lap3 | 0.795632 | 1.233998 | 1.06722 | Cluster3 | 0.994537 |
| Q99M04 | 317 | K | Lias | 0.743667 | 1.244261 | 1.095428 | Cluster3 | 0.966865 |
| Q7TMF3 | 8 | K | Ndufa12 | 0.688894 | 1.429095 | 1.146566 | Cluster3 | 0.989812 |
| Q9D6J6 | 208 | K | Ndufv2 | 0.636143 | 1.398587 | 0.936053 | Cluster3 | 0.940476 |
| P19246 | 606 | K | Nefh | 0.759932 | 1.199443 | 1.186384 | Cluster3 | 0.674418 |
| Q810U3 | 86 | K | Nfasc | 0.795258 | 1.210911 | 1.088792 | Cluster3 | 0.96997 |
| Q8BYM5 | 597 | K | Nlgn3 | 0.774363 | 1.256474 | 1.062022 | Cluster3 | 0.995118 |
| P15532 | 12 | K | Nme1 | 0.774863 | 1.313915 | 1.000592 | Cluster3 | 0.936894 |
| P97300 | 147 | K | Nptn | 0.766581 | 1.308548 | 1.006998 | Cluster3 | 0.951499 |
| Q9D0K2 | 446 | K | Oxct1 | 0.754389 | 1.60657 | 0.719168 | Cluster3 | 0.572307 |
| Q8K1R3 | 583 | K | Pnpt1 | 0.841271 | 1.26709 | 0.969247 | Cluster3 | 0.843629 |
| O55042 | 80 | K | Snca | 0.716318 | 1.370513 | 1.115261 | Cluster3 | 0.992992 |
| P61264 | 82 | K | Stx1b | 0.765787 | 1.221265 | 1.096467 | Cluster3 | 0.955942 |
| Q921I1 | 26 | K | Tf | 0.566511 | 1.196647 | 1.220807 | Cluster3 | 0.580478 |
| P68372 | 324 | K | Tubb4b | 0.648199 | 1.252178 | 1.233919 | Cluster3 | 0.671354 |
| P50544 | 196 | K | Acadvl | 0.558626 | 1.174756 | 1.38738 | Cluster4 | 0.703216 |
| Q9WTP7 | 20 | K | Ak3 | 0.637082 | 1.125741 | 1.358481 | Cluster4 | 0.824632 |
| Q8VDN2 | 45 | K | Atp1a1 | 0.693805 | 1.111016 | 1.34842 | Cluster4 | 0.889063 |
| Q03265 | 218 | K | Atp5f1a | 0.792678 | 0.958886 | 1.318252 | Cluster4 | 0.942976 |
| Q9DB20 | 60 | K | Atp5po | 0.715834 | 0.821276 | 1.544576 | Cluster4 | 0.816549 |
| Q91XV3 | 18 | K | Basp1 | 0.82323 | 0.996406 | 1.399443 | Cluster4 | 0.934729 |
| P12960 | 757 | K | Cntn1 | 0.78273 | 0.839123 | 1.419416 | Cluster4 | 0.775625 |
| P42125 | 206 | K | Eci1 | 0.766821 | 1.142021 | 1.221957 | Cluster4 | 0.624538 |
| P03995 | 83 | K | Gfap | 0.662988 | 1.083795 | 1.344979 | Cluster4 | 0.906423 |
| P03995 | 402 | K | Gfap | 0.653539 | 1.147929 | 1.377123 | Cluster4 | 0.818045 |
| P10649 | 136 | K | Gstm1 | 0.773828 | 0.97688 | 1.203524 | Cluster4 | 0.996049 |
| Q8BMS1 | 644 | K | Hadha | 0.677082 | 1.092734 | 1.336029 | Cluster4 | 0.894681 |
| P63017 | 328 | K | Hspa8 | 0.687012 | 1.037169 | 1.360245 | Cluster4 | 0.98149 |
| P63017 | 246 | K | Hspa8 | 0.926996 | 0.771531 | 1.524469 | Cluster4 | 0.52758 |
| P01837 | 100 | K | Igkc | 0.247969 | 1.249001 | 1.439956 | Cluster4 | 0.486877 |
| Q9CXD6 | 253 | K | Mcur1 | 0.840741 | 0.93848 | 1.289309 | Cluster4 | 0.869425 |
| P08249 | 91 | K | Mdh2 | 0.617209 | 0.86075 | 1.615288 | Cluster4 | 0.926356 |
| Q9D2P8 | 104 | K | Mobp | 0.725134 | 0.989811 | 1.381613 | Cluster4 | 0.989338 |
| P03921 | 540 | K | Mtnd5 | 0.837361 | 0.933279 | 1.324314 | Cluster4 | 0.855572 |
| A2AQP0 | 919 | K | Myh7b | 0.658052 | 1.105376 | 1.360174 | Cluster4 | 0.881349 |
| Q99LC3 | 84 | K | Ndufa10 | 0.831812 | 0.932802 | 1.305309 | Cluster4 | 0.867479 |
| P58281 | 328 | K | Opa1 | 0.638958 | 0.917724 | 1.523682 | Cluster4 | 0.964922 |
| Q9D404 | 113 | K | Oxsm | 0.826206 | 1.014256 | 1.244131 | Cluster4 | 0.993218 |
| P63001 | 166 | K | Rac1 | 0.852517 | 0.93864 | 1.294278 | Cluster4 | 0.851475 |
| Q3U186 | 557 | K | Rars2 | 0.696368 | 0.930443 | 1.478469 | Cluster4 | 0.948843 |
| Q9D8S4 | 160 | K | Rexo2 | 0.822701 | 0.881317 | 1.325706 | Cluster4 | 0.7936 |
| Q8K0T0 | 646 | K | Rtn1 | 0.808788 | 1.052804 | 1.222454 | Cluster4 | 0.96078 |
| O55131 | 237 | K | Septin7 | 0.750892 | 1.046997 | 1.281636 | Cluster4 | 0.971705 |
| Q00898 | 181 | K | Serpina1e | 0.411006 | 1.110123 | 1.554505 | Cluster4 | 0.832672 |
| Q9CZN7 | 469 | K | Shmt2 | 0.708836 | 1.114307 | 1.265002 | Cluster4 | 0.773435 |
| P56564 | 521 | K | Slc1a3 | 0.721143 | 1.149019 | 1.221141 | Cluster4 | 0.560949 |
| P09671 | 89 | K | Sod2 | 0.783062 | 1.053396 | 1.227701 | Cluster4 | 0.943542 |
| Q91WK1 | 95 | K | Spryd4 | 0.658436 | 1.140173 | 1.287264 | Cluster4 | 0.6994 |
| P16546 | 1419 | K | Sptan1 | 0.73685 | 0.978445 | 1.372965 | Cluster4 | 0.98112 |
| P16546 | 30 | K | Sptan1 | 0.782485 | 1.083096 | 1.210689 | Cluster4 | 0.835994 |
| Q921I1 | 467 | K | Tf | 0.510739 | 1.158636 | 1.31176 | Cluster4 | 0.5954 |
| Q9D855 | 45 | K | Uqcrb | 0.656292 | 1.077967 | 1.363866 | Cluster4 | 0.924966 |
| Q60931 | 274 | K | Vdac3 | 0.72023 | 1.043014 | 1.324927 | Cluster4 | 0.979392 |
| P62761 | 74 | K | Vsnl1 | 0.765197 | 0.976709 | 1.363983 | Cluster4 | 0.967516 |
| Q99N28 | 215 | K | Cadm3 | 1.271924 | 0.696885 | NA | NA | NA |
| Q60931 | 96 | K | Vdac3 | 0.716654 | 1.186302 | NA | NA | NA |
